# Supplementary material
Source: PubMed Central journal article supplement (PMC7960364)
Supplement: 16-00817.pdf [file 16-00817.pdf]

**On-line Table: Neuropsychological and language markers for all participant groups<sup>a</sup>**

| Neuropsychological Tests                          | svPPA                         | nfvPPA                       | lvPPA                          | AD                          | HC           | Omnibus Sig<br>P Value |
|---------------------------------------------------|-------------------------------|------------------------------|--------------------------------|-----------------------------|--------------|------------------------|
| MMSE (mean) (SD)                                  | 23 (2.8) <sup>b</sup>         | 24.6 (3.1) <sup>b</sup>      | 17.9 (5.8) <sup>b-e</sup>      | 22.5 (3.1) <sup>b</sup>     | 29.22 (1.2)  | <.001                  |
| ACE-R (mean) (SD)                                 | 52 (13.4) <sup>b,f</sup>      | 74.1 (11.3) <sup>b</sup>     | 46.5 (15.7) <sup>b,g,h</sup>   | 65 (12.2) <sup>b</sup>      | 94.41 (4.0)  | <.001                  |
| Forward digit span (mean) (SD)                    | 6.3 (1.3)                     | 4.5 (2.2) <sup>b,e,i</sup>   | 4.4 (2.9) <sup>b,e,i</sup>     | 6 (1.1)                     | 6.72 (1.1)   | <.001                  |
| Letter fluency (wpm) (mean) (SD)                  | 6 (3.4) <sup>b,h</sup>        | 5.3 (2.7) <sup>b,e</sup>     | 4.8 (3.1) <sup>b,e</sup>       | 9.5 (5.9) <sup>j</sup>      | 14.47 (4.5)  | <.001                  |
| Sentence repetition (12) (mean) (SD) <sup>n</sup> | 10 (2.8) <sup>b</sup>         | 7.3 (1.9) <sup>b</sup>       | 6.0 (3.1) <sup>b</sup>         | 10.4 (2.4) <sup>j</sup>     | 11.84 (0.4)  | <.001                  |
| TROG (28) (mean) (SD) <sup>n</sup>                | 25.6 (4.81) <sup>b</sup>      | 24.6 (5.7) <sup>b</sup>      | 19.6 (8.2) <sup>b,f,h,k</sup>  | 25 (3.1) <sup>b</sup>       | 27.91 (0.3)  | <.001                  |
| Camel & Cactus (64) (mean) (SD)                   | 29 (15.82) <sup>b,d,l,h</sup> | 54.5 (7.3)                   | 40.79 (11.2) <sup>b,c</sup>    | 47 (9.64) <sup>b</sup>      | 58.65 (2.76) | <.001                  |
| 64 Item naming (64) (mean) (SD)                   | 20 (16.4) <sup>b,d,e,l</sup>  | 62.5 (3.7)                   | 42.6 (12.3) <sup>b,g</sup>     | 55.7 (7.0) <sup>m</sup>     | 62.31 (1.9)  | <.001                  |
| Rey Complex Figure Copy (36) (mean) (SD)          | 33 (1.95)                     | 26.5 (3.8) <sup>j,k</sup>    | 21.1 (9.6) <sup>b,c</sup>      | 23 (12.9) <sup>b,i</sup>    | 34.63 (1.9)  | <.001                  |
| Rey Complex Figure Recall (36) (mean) (SD)        | 10 (8.77) <sup>j</sup>        | 10.7 (0–23) <sup>j</sup>     | 7.4 (0–21) <sup>b</sup>        | 3.4 (4.53) <sup>b,f,k</sup> | 18.28 (6.3)  | <.001                  |
| Connected speech measures                         |                               |                              |                                |                             |              |                        |
| Rate (wpm) (mean) (range)                         | 112 (58–162) <sup>m</sup>     | 60 (20–95) <sup>b,c,e</sup>  | 83 (24–149) <sup>b,k,h</sup>   | 116 (54–177) <sup>m</sup>   | 140 (89–190) | <.001                  |
| Mean unit length (range)                          | 7.4 (5–10) <sup>m</sup>       | 5.5 (3–8.9) <sup>b,k,h</sup> | 5.2 (2.7–7.3) <sup>b,k,h</sup> | 7.4 (5–19) <sup>m</sup>     | 9.5 (6–15)   | <.001                  |
| Frequency of complex units (mean) (range)         | 0.8 (0.6–0.9) <sup>m</sup>    | 0.1 (0–0.6) <sup>b,e,l</sup> | 0.1 (0–0.4) <sup>b,c,e</sup>   | 0.7 (0.6–1) <sup>j</sup>    | 0.9 (0.6–1)  | <.001                  |

**Note:**—MMSE indicates Mini-Mental State Examination (Folstein et al. *J Psychiatr Res* 1975;12:189–98); ACE-R, Addenbrooke's Cognitive Examination-Revised (Mioshi et al. *Int J Geriatr Psychiatry* 2006;21:1078–85); TROG, Test for Reception of Grammar (Bishop D. Psychological Corporation; 1989); wpm, words per minute; HC, healthy controls.

<sup>a</sup> The numbers in the parentheses in column 1 indicate maximum scores.

<sup>b</sup>  $P < .001$  compared with controls.

<sup>c</sup>  $P < .01$  compared with svPPA.

<sup>d</sup>  $P < .001$  compared with nfvPPA.

<sup>e</sup>  $P < .01$  compared with AD.

<sup>f</sup>  $P < .05$  compared with nfvPPA.

<sup>g</sup>  $P < .01$  compared with nfvPPA.

<sup>h</sup>  $P < .05$  compared with AD.

<sup>i</sup>  $P < .001$  compared with svPPA.

<sup>j</sup>  $P < .01$  compared with controls.

<sup>k</sup>  $P < .05$  compared with svPPA.

<sup>l</sup>  $P < .05$  compared with mixed PPA.

<sup>m</sup>  $P < .05$  compared with controls.

<sup>n</sup> Nonparametric test.
